# Supplementary material
Source: publisher figshare collection journal article supplement (https://plos.figshare.com/articles/dataset/_/4292942)
Supplement: Supplementary file [file 1]

**S1 Table. Detailed results of the mosquito trapping and testing**

| <i>Date</i> | <i>Species</i>       | <i>Sex</i> | <i>Number</i> | <i>N Pool</i> | <i>JEV PCR result</i> |
|-------------|----------------------|------------|---------------|---------------|-----------------------|
| 09/04/2014  | Cx.gelidus           | F          | 41            | 5             | Negative              |
| 09/04/2014  | Cx.vishnui group     | F          | 8             | 1             | Negative              |
| 09/04/2014  | Cx.tritaeniorhynchus | F          | 50            | 5             | Negative              |
| 15/04/2014  | Cx.gelidus           | F          | 14            | 2             | Negative              |
| 15/04/2014  | Cx.tritaeniorhynchus | F          | 104           | 11            | Negative              |
| 15/04/2014  | Other spp            | F          | 1             | 1             | Negative              |
| 23/04/2014  | Cx.gelidus           | F          | 220           | 22            | Negative              |
| 23/04/2014  | Cx.vishnui group     | F          | 16            | 2             | Negative              |
| 23/04/2014  | Cx.tritaeniorhynchus | F          | 80            | 8             | Negative              |
| 23/04/2014  | Other spp            | F          | 4             | 1             | Negative              |
| 06/05/2014  | Cx.gelidus           | F          | 31            | 4             | Negative              |
| 06/05/2014  | Cx.vishnui group     | F          | 6             | 1             | Negative              |
| 06/05/2014  | Cx.tritaeniorhynchus | F          | 183           | 19            | Negative              |
| 06/05/2014  | Other spp            | F          | 2             | 1             | Negative              |
| 20/05/2014  | Cx.gelidus           | F          | 48            | 5             | Negative              |
| 20/05/2014  | Cx.vishnui group     | F          | 37            | 4             | Negative              |
| 20/05/2014  | Cx.tritaeniorhynchus | F          | 546           | 55            | Negative              |
| 20/05/2014  | Cx.quinquefasciatus  | F          | 1             | 1             | Negative              |
| 20/05/2014  | Mansonia spp         | F          | 1             | 1             | Negative              |
| 20/05/2014  | Other spp            | F          | 1             | 1             | Negative              |
| 27/05/2014  | Cx.gelidus           | F          | 116           | 12            | Negative              |
| 27/05/2014  | Cx.gelidus           | M          | 2             | 1             | Negative              |
| 27/05/2014  | Cx.vishnui group     | F          | 43            | 5             | Negative              |

|            |                      |   |      |     |          |
|------------|----------------------|---|------|-----|----------|
| 27/05/2014 | Cx.tritaeniorhynchus | F | 1107 | 111 | Negative |
| 27/05/2014 | Other spp            | M | 3    | 1   | Negative |
| 06/06/2014 | Cx.gelidus           | F | 134  | 14  | Negative |
| 06/06/2014 | Cx.vishnui group     | F | 110  | 11  | Negative |
| 06/06/2014 | Cx.tritaeniorhynchus | F | 578  | 58  | Negative |
| 06/06/2014 | Mansonia spp         | F | 2    | 1   | Negative |
| 06/06/2014 | Other spp            | F | 1    | 1   | Negative |
| 12/06/2014 | Cx.gelidus           | F | 116  | 12  | Negative |
| 12/06/2014 | Cx.vishnui group     | F | 9    | 1   | Negative |
| 12/06/2014 | Cx.tritaeniorhynchus | F | 678  | 68  | Negative |
| 12/06/2014 | Cx.quinquefasciatus  | F | 3    | 1   | Negative |
| 12/06/2014 | Mansonia spp         | F | 1    | 1   | Negative |
| 12/06/2014 | Mansonia spp         | M | 1    | 1   | Negative |
| 12/06/2014 | Other spp            | F | 3    | 1   | Negative |
| 12/06/2014 | Other spp            | M | 2    | 1   | Negative |
| 27/06/2014 | Cx.gelidus           | F | 1    | 1   | Negative |
| 27/06/2014 | Cx.vishnui group     | F | 3    | 1   | Negative |
| 27/06/2014 | Cx.tritaeniorhynchus | F | 3    | 1   | Negative |
| 08/07/2014 | Cx.gelidus           | F | 182  | 18  | Negative |
| 08/07/2014 | Cx.vishnui group     | F | 28   | 3   | Negative |
| 08/07/2014 | Cx.tritaeniorhynchus | F | 332  | 33  | Negative |
| 08/07/2014 | Cx.quinquefasciatus  | F | 2    | 1   | Negative |
| 18/07/2014 | Cx.gelidus           | F | 250  | 25  | Negative |
| 18/07/2014 | Cx.gelidus           | M | 1    | 1   | Negative |
| 18/07/2014 | Cx.vishnui group     | F | 164  | 17  | Negative |

|                   |                             |          |           |          |                        |
|-------------------|-----------------------------|----------|-----------|----------|------------------------|
| 18/07/2014        | Cx.tritaeniorhynchus        | F        | 711       | 71       | Negative               |
| 18/07/2014        | Cx.quinquefasciatus         | F        | 3         | 1        | Negative               |
| 29/07/2014        | Cx.gelidus                  | F        | 224       | 23       | Negative               |
| 29/07/2014        | Cx.gelidus                  | M        | 4         | 1        | Negative               |
| 29/07/2014        | Cx.vishnui group            | F        | 41        | 4        | Negative               |
| 29/07/2014        | Cx.tritaeniorhynchus        | F        | 422       | 42       | Negative               |
| 29/07/2014        | Cx.quinquefasciatus         | F        | 7         | 1        | Negative               |
| 29/07/2014        | Cx.quinquefasciatus         | M        | 13        | 2        | Negative               |
| 29/07/2014        | Cx. fuscocephala            | F        | 1         | 1        | Negative               |
| 29/07/2014        | Mansonia spp                | F        | 1         | 1        | Negative               |
| 29/07/2014        | Other spp                   | F        | 1         | 1        | Negative               |
| 29/07/2014        | Anopheles spp               | F        | 2         | 1        | Negative               |
| 02/09/2014        | Cx.gelidus                  | F        | 62        | 6        | Negative               |
| 02/09/2014        | Cx.tritaeniorhynchus        | F        | 63        | 6        | Negative               |
| 02/09/2014        | Cx.tritaeniorhynchus        | M        | 4         | 1        | Negative               |
| 02/09/2014        | Cx.vishnui group            | F        | 18        | 2        | Negative               |
| 02/09/2014        | Cx.vishnui group            | M        | 6         | 1        | Negative               |
| 02/09/2014        | Cx.quinquefasciatus         | F        | 2         | 1        | Negative               |
| 12/09/2014        | Cx.gelidus                  | F        | 26        | 3        | Negative               |
| <b>12/09/2014</b> | <b>Cx.tritaeniorhynchus</b> | <b>F</b> | <b>84</b> | <b>9</b> | <b>1 pool Positive</b> |
| 12/09/2014        | Cx.vishnui group            | F        | 52        | 5        | Negative               |
| 12/09/2014        | Cx.quinquefasciatus         | F        | 1         | 1        | Negative               |
| 19/09/2014        | Cx.gelidus                  | F        | 5         | 1        | Negative               |
| 19/09/2014        | Cx.tritaeniorhynchus        | F        | 27        | 3        | Negative               |
| 19/09/2014        | Cx.tritaeniorhynchus        | M        | 1         | 1        | Negative               |
| 19/09/2014        | Cx.vishnui group            | F        | 21        | 2        | Negative               |

|            |                      |   |     |    |          |
|------------|----------------------|---|-----|----|----------|
| 19/09/2014 | Cx.quinquefasciatus  | F | 2   | 1  | Negative |
| 19/09/2014 | Cx.quinquefasciatus  | M | 2   | 1  | Negative |
| 19/09/2014 | Mansonia spp         | F | 1   | 1  | Negative |
| 19/09/2014 | Anopheles spp        | F | 1   | 1  | Negative |
| 29/09/2014 | Cx.gelidus           | F | 24  | 3  | Negative |
| 29/09/2014 | Cx.gelidus           | M | 1   | 1  | Negative |
| 29/09/2014 | Cx.tritaeniorhynchus | F | 139 | 14 | Negative |
| 29/09/2014 | Cx.vishnui group     | F | 60  | 6  | Negative |
| 29/09/2014 | Cx.quinquefasciatus  | F | 5   | 1  | Negative |
| 29/09/2014 | Cx.quinquefasciatus  | M | 9   | 1  | Negative |
| 29/09/2014 | Mansonia spp         | F | 1   | 1  | Negative |
| 29/09/2014 | Other spp            | F | 1   | 1  | Negative |
| 29/09/2014 | Other spp            | M | 1   | 1  | Negative |
| 29/09/2014 | Anopheles spp        | F | 1   | 1  | Negative |
| 10/10/2014 | Cx.gelidus           | F | 19  | 3  | Negative |
| 10/10/2014 | Cx.tritaeniorhynchus | F | 28  | 3  | Negative |
| 10/10/2014 | Cx.vishnui group     | F | 15  | 2  | Negative |
| 10/10/2014 | Cx.quinquefasciatus  | F | 10  | 1  | Negative |
| 10/10/2014 | Cx.quinquefasciatus  | M | 2   | 1  | Negative |
| 20/10/2014 | Cx.gelidus           | F | 90  | 9  | Negative |
| 20/10/2014 | Cx.tritaeniorhynchus | F | 158 | 16 | Negative |
| 20/10/2014 | Cx.vishnui group     | F | 50  | 5  | Negative |
| 20/10/2014 | Cx.quinquefasciatus  | F | 4   | 1  | Negative |
| 20/10/2014 | Cx.quinquefasciatus  | M | 2   | 1  | Negative |
| 20/10/2014 | Mansonia spp         | F | 2   | 1  | Negative |
| 20/10/2014 | Other spp            | F | 1   | 1  | Negative |

|             |                      |   |     |    |          |
|-------------|----------------------|---|-----|----|----------|
| 30/10/2014  | Cx.gelidus           | F | 90  | 9  | Negative |
| 30/10/2014  | Cx.tritaeniorhynchus | F | 220 | 22 | Negative |
| 30/10/2014  | Cx.vishnui group     | F | 90  | 9  | Negative |
| 30/10/2014  | Cx.quinquefasciatus  | F | 19  | 2  | Negative |
| 30/10/2014  | Anopheles spp        | F | 10  | 1  | Negative |
| 30/10/2014  | Mansonia spp         | F | 3   | 1  | Negative |
| 30/10/2014  | Other spp            | F | 1   | 1  | Negative |
| 10/11/2014  | Cx.gelidus           | F | 16  | 2  | Negative |
| 10/11/2014  | Cx.vishnui group     | F | 75  | 8  | Negative |
| 10/11/2014  | Cx.tritaeniorhynchus | F | 145 | 15 | Negative |
| 10/11/2014  | Cx.quinquefasciatus  | F | 5   | 1  | Negative |
| 10/11/2014  | Cx. fuscocephala     | F | 1   | 1  | Negative |
| 20/11/2014  | Cx.gelidus           | F | 30  | 3  | Negative |
| 20/11/2014  | Cx.tritaeniorhynchus | F | 51  | 5  | Negative |
| 20/11/2014  | Cx.vishnui group     | F | 27  | 3  | Negative |
| 20/11/2014  | Cx.quinquefasciatus  | F | 2   | 1  | Negative |
| 02/12/2014  | Cx.gelidus           | F | 30  | 3  | Negative |
| 02/12/2014  | Cx.vishnui group     | F | 241 | 24 | Negative |
| 02/12/2014  | Cx.tritaeniorhynchus | F | 853 | 86 | Negative |
| 02/12/2014  | Cx.quinquefasciatus  | F | 11  | 1  | Negative |
| 10/12/20014 | Cx.gelidus           | F | 77  | 8  | Negative |
| 10/12/20014 | Cx.vishnui group     | F | 188 | 19 | Negative |
| 10/12/20014 | Cx.quinquefasciatus  | F | 4   | 1  | Negative |
| 10/12/20014 | Cx.tritaeniorhynchus | F | 900 | 90 | Negative |
| 22/12/2014  | Cx.gelidus           | F | 14  | 2  | Negative |

|            |                      |   |    |   |          |
|------------|----------------------|---|----|---|----------|
| 22/12/2014 | Cx.tritaeniorhynchus | F | 41 | 4 | Negative |
| 22/12/2014 | Cx.vishnui group     | F | 32 | 4 | Negative |
| 22/12/2014 | Cx.quinquefasciatus  | F | 2  | 1 | Negative |
| 02/01/2015 | Cx.gelidus           | F | 30 | 3 | Negative |
| 02/01/2015 | Cx.tritaeniorhynchus | F | 40 | 4 | Negative |
| 02/01/2015 | Cx.vishnui group     | F | 13 | 2 | Negative |
| 02/01/2015 | Cx.quinquefasciatus  | F | 4  | 1 | Negative |
| 12/01/2015 | Cx.gelidus           | F | 8  | 1 | Negative |
| 12/01/2015 | Cx.tritaeniorhynchus | F | 70 | 7 | Negative |
| 12/01/2015 | Cx.vishnui group     | F | 26 | 3 | Negative |
| 12/01/2015 | Cx.quinquefasciatus  | F | 16 | 2 | Negative |
