# Supplementary material
Source: publisher figshare collection journal article supplement (https://plos.figshare.com/articles/dataset/_/4292942)
Supplement: Supplementary file [file 1]

**S2 Table: Oligonucleotide primers for qRT-PCR amplification of JEV complete genome**

| Primer name         | Oligonucleotide sequence (5-3) | Orientation |
|---------------------|--------------------------------|-------------|
| JEN(1-20)*          | TGTGTCAACTTCTTGGCTTA           | Sense       |
| JEN(520-539)        | GCTTGCAATGTCCGTGTTGT           | Antisense   |
| JEM(429-448)        | ATCATGTGGCTCGCAAGCTT           | Sense       |
| JEM(1,029-1,048)    | TCCTTCTAGCACCAAGTACA           | Antisense   |
| JEE(960-979)        | GTCGCTCCGGCTTACAGTTT           | Sense       |
| JEE(2,482-2,501)    | GATGTCAATGGCACAGCCGT           | Antisense   |
| JENS(2,478-2,498)   | GAACTGGATGTGCCATTGAC           | Sense       |
| JENS(3,512-3,533)   | AGCATCAACCTGTGATCTGACG         | Antisense   |
| JENS(3,481-3,500)   | TCAGACCTGTTAGGCATGAT           | Sense       |
| JENS(4,421-4,440)   | CTAGCCTCCGGCTGCTTCCT           | Antisense   |
| JENS(4,381-4,400)   | GGGCTGCCGATATCAGCTGG           | Sense       |
| JENS(5,351-5,370)   | TTCCCTGATGCTCCCTCTGC           | Antisense   |
| JENS(5,313-5,322)   | TTGAGAGGACTCCCAGTACG           | Sense       |
| JENS(6,270-6,289)   | CTGTCAGTGTACTGAATGCC           | Antisense   |
| JENS(6,171-6,190)   | GGAGAGTACCGTTCTAGAGG           | Sense       |
| JENS(7,041-7,060)   | ACTGTGCTCCCCCATAACAG           | Antisense   |
| JENS(6,981-7,000)   | CCGATTGCCAAGCATGGCA            | Sense       |
| JENS(7,981-8,000)   | CGCCCCACCTTTCGTGTACC           | Antisense   |
| JENS(7,921-7,940)   | GCGGGCGCGGAAGCTGGAAC           | Sense       |
| JENS(8,931-8,950)   | CAGGCCGTGCTCCATTGATT           | Antisense   |
| JENS(8,891-8,910)   | CAACAGCAACGCGTCTCTCG           | Sense       |
| JENS(9,901-9,920)   | TCCTGGGGAGATGCGCGCCC           | Antisense   |
| JENS(9,861-9,880)   | CTACTCGTCCCGTGCAGAGG           | Sense       |
| JENS(10,944-10,963) | AGATCCTGTGTTCTTCTCA            | Antisense   |
